# Supplementary material for: Mitochondria-Associated Membranes (MAMs) are involved in Bax mitochondrial localization and cytochrome c release
Source: PubMed Central journal article supplement (PMC6506693; doi:10.15698/mic2019.05.678), 2019-03-15

**Supplementary Figure S1: Mitochondrial network morphology in  $\Delta mdm34$  cells.**

Cells expressing a mitochondria-addressed Idh1-GFP fusion were observed under an epifluorescence microscope.

**BY4742 (Wild-Type)**

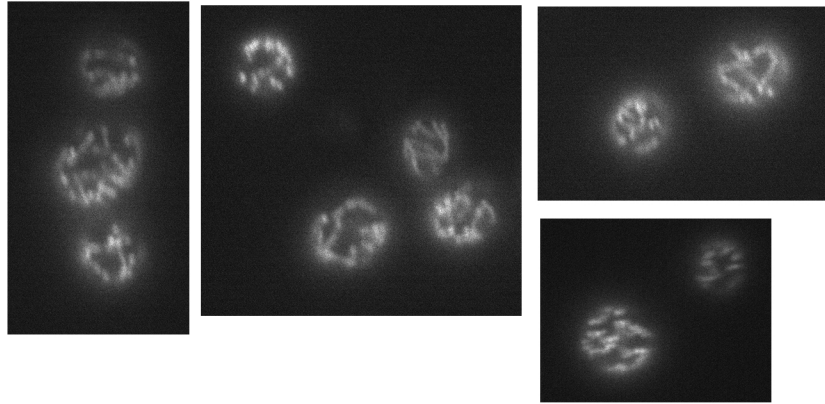

**BY4742  $\Delta mdm34::KanMX4$**

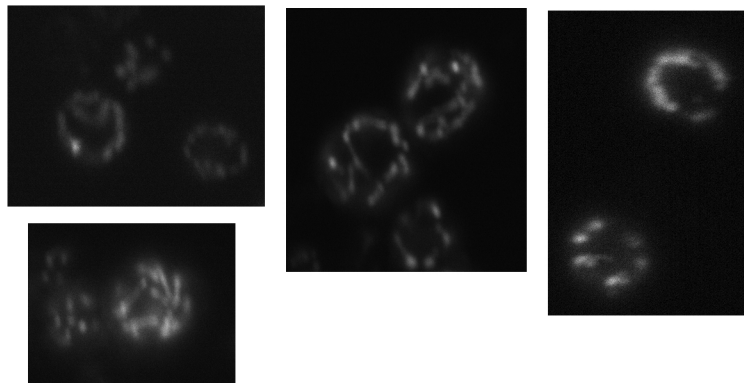

Supplement: mic-06-257-s01.pdf [file mic-06-257-s01.pdf]
